# Supplementary material
Source: publisher figshare collection journal article supplement (https://acs.figshare.com/ndownloader/files/8843284)
Supplement: Supplementary file 1 [file 8843284]

Supporting Information

# Formation and Structure of Wild Type Huntingtin Exon-1 Fibrils

J. Mario Isas, Andreas Langen, Myles C. Isas, Nitin K. Pandey, and Ansgar B. Siemer\*

Department of Biochemistry and Molecular Medicine, Zilkha Neurogenetic Institute, Keck School of Medicine, University of Southern California

\*Corresponding author: 1501 San Pablo Street, Los Angeles, California 90033, United States;

Phone: 323 442 2720; Email: [asiemer@usc.edu](mailto:asiemer@usc.edu)

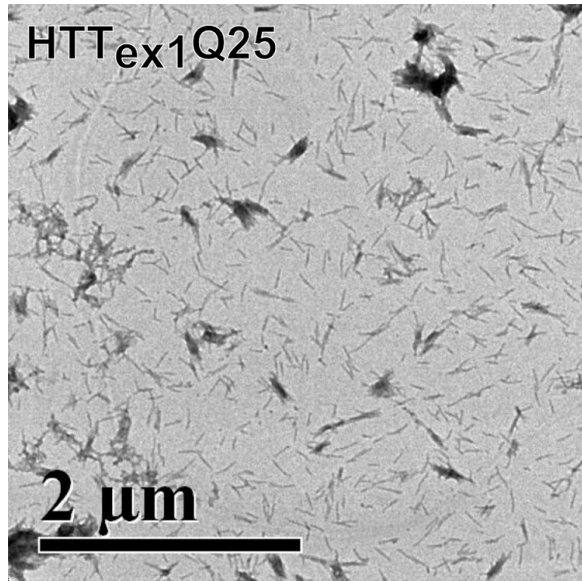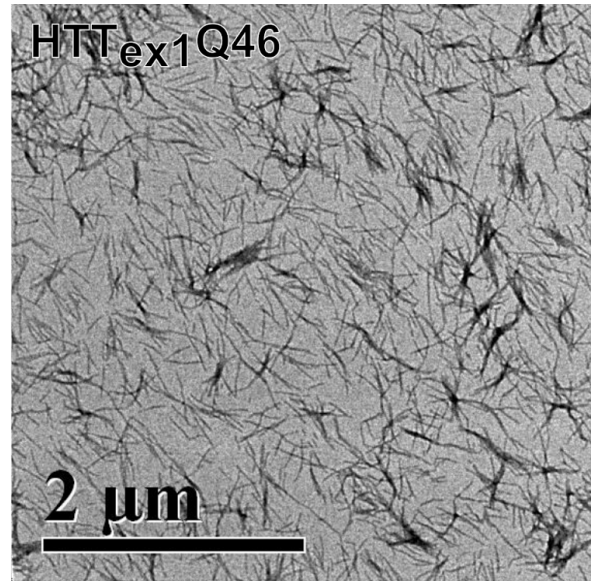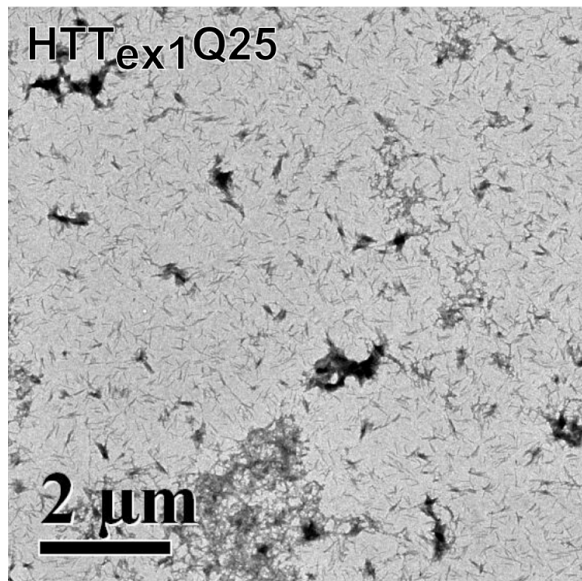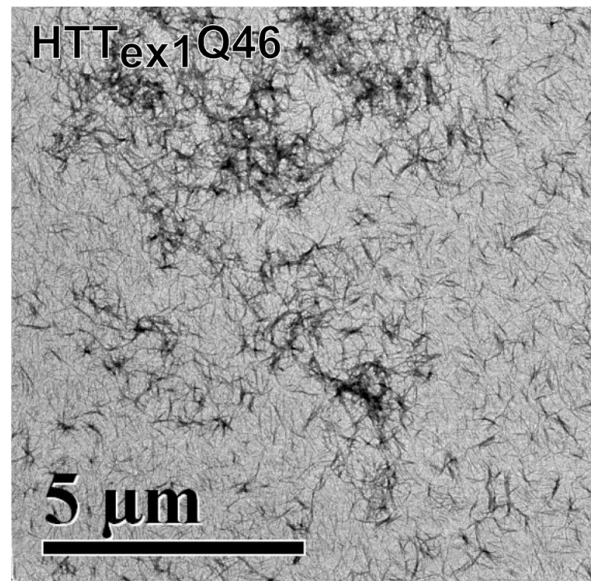

**Figure S1:** Electron micrographs supplemental to Figure 1 of negatively stained fibrils formed by HTT<sub>ex1</sub>Q25 and HTT<sub>ex1</sub>Q46 in the presence of 5% HTT<sub>ex1</sub>Q46 fibril seeds grown for 24h at 4°C. HTT<sub>ex1</sub>Q25 fibrils are shorter than the comparable HTT<sub>ex1</sub>Q46 fibrils.

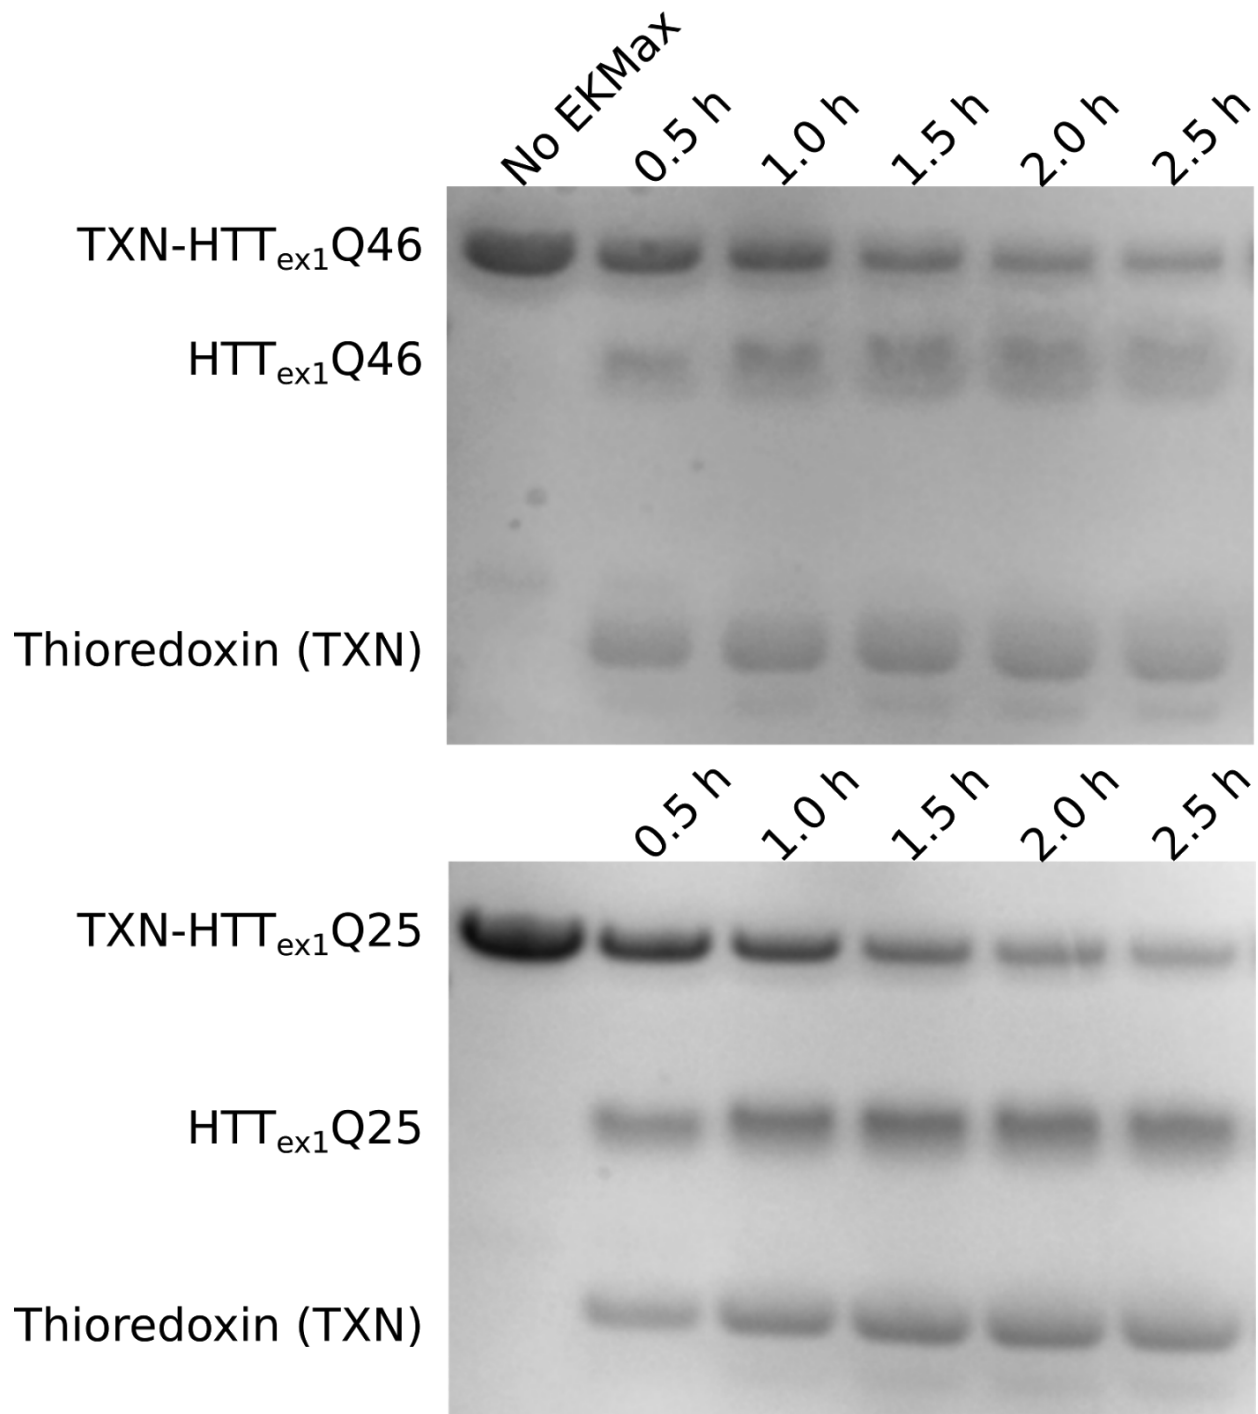

**Figure S2:** EKMax digestion of thioredoxin tagged HTT<sub>ex1</sub> Q25 and Q46. SDS page of sample before and at different time points after adding 1 unit EKMax per 280 µg of fusion protein. The bands corresponding to the intact fusion protein, HTT<sub>ex1</sub>, and thioredoxin are indicated for HTT<sub>ex1</sub>Q46 (top) and HTT<sub>ex1</sub>Q25 (bottom). After 2.5 h the majority of the fusion protein has been digested in both cases.

HTT<sub>ex1</sub>Q46 35R1

-0.0375 monomer spectrum

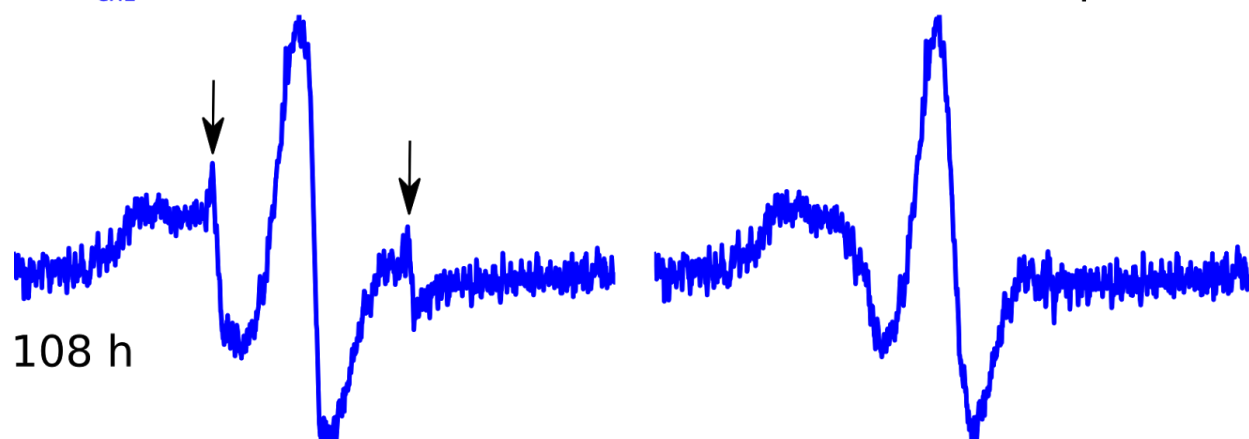

HTT<sub>ex1</sub>Q25 35R1

-0.65 monomer spectrum

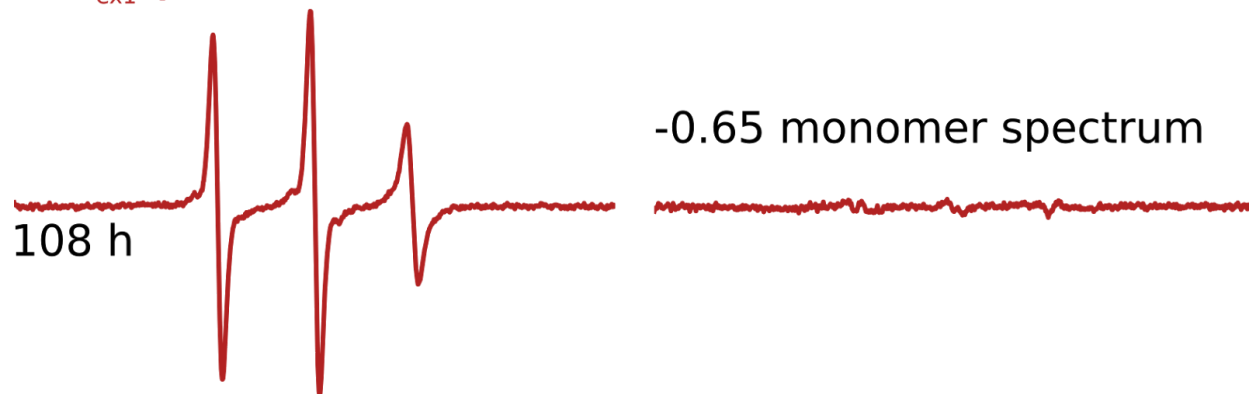

**Figure S3:** Measurement of equilibrium monomer concentration from the EPR spectra of Figure 3. The EPR spectra of the monomeric state at 0 h were scaled and subtracted from the spectrum after 108 h so that the sharp component, corresponding to the monomer, was minimized. The measured scaling factors and the total protein concentration of 25  $\mu\text{M}$  resulted in equilibrium monomer concentrations of 0.94  $\mu\text{M}$  and 16.25  $\mu\text{M}$  for HTT<sub>ex1</sub>Q46 and HTT<sub>ex1</sub>Q25, respectively.

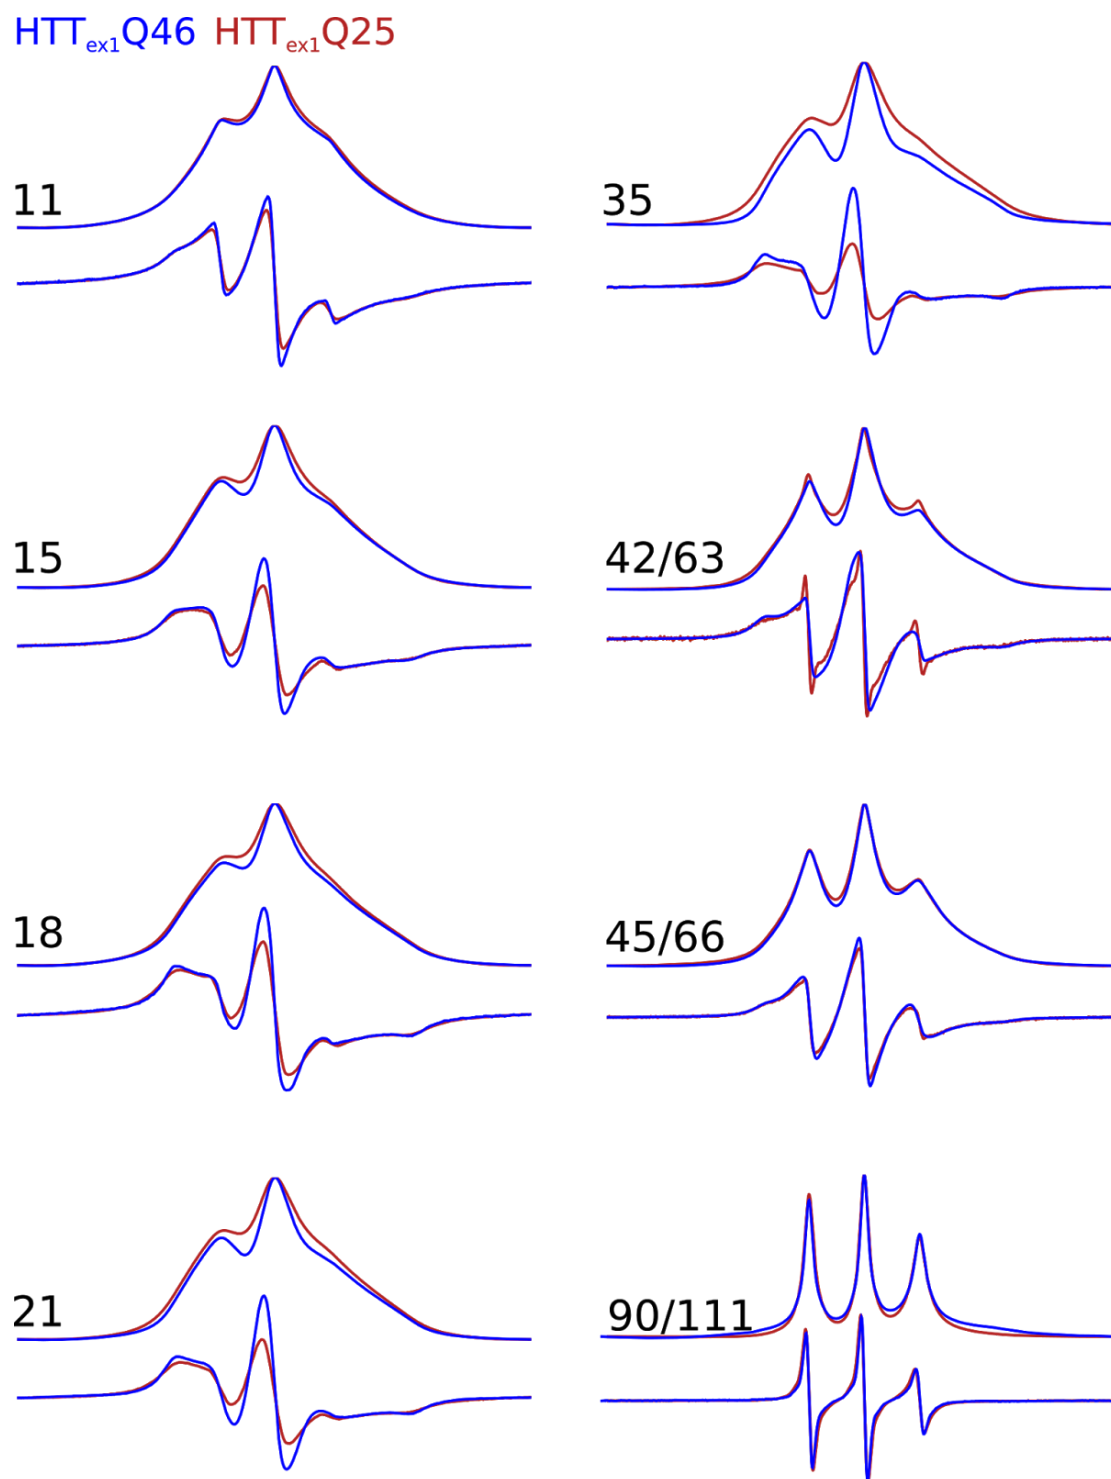

**Figure S4:** EPR spectra of HTT<sub>ex1</sub> Q46 and Q25 that were shown in Figure 6 plotted as 1<sup>st</sup> integral (top) and normalized to the same number of spins (bottom) to illustrate their similarities and differences. The integral shows broader lines for some of the HTT<sub>ex1</sub> Q25 samples (i.e. 15R1–42R1). In the EPR spectra normalized to the same number of spins, the broader lines translate into a decrease of the overall intensity of the corresponding HTT<sub>ex1</sub> Q25 spectra.

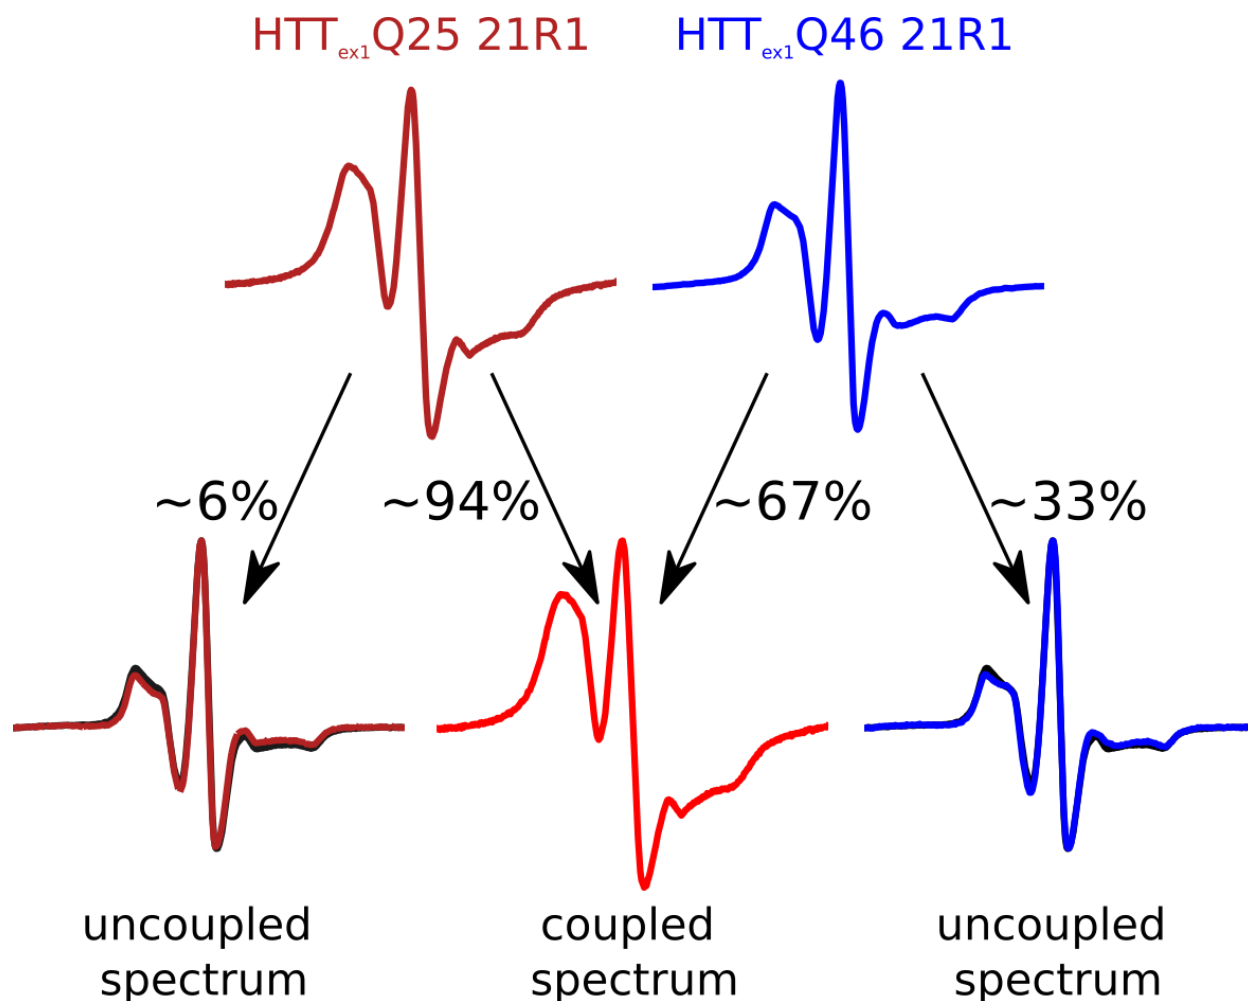

**Figure S5:** The EPR spectrum of HTT<sub>ex1</sub>Q25 21R1 has a larger spin-spin coupling component compared to HTT<sub>ex1</sub>Q46 21R1. The EPR spectra of HTT<sub>ex1</sub>Q25 and HTT<sub>ex1</sub>Q46 R21 are shown on top. Both spectra are composed of an uncoupled component, corresponding to the EPR spectrum of the 10% MTSL labeled HTT<sub>ex1</sub>Q25 21R1 shown in black at the bottom, and a coupled component shown in red that was determined by subtracting the HTT<sub>ex1</sub>Q46 21R1 from the HTT<sub>ex1</sub>Q25 21R1 spectrum. Consequently, both spectra were deconvoluted using the coupled and uncoupled component showing that the spectrum of HTT<sub>ex1</sub>Q25 21R1 is overwhelmingly dominated by spin-spin coupling, whereas about a third of the spins in HTT<sub>ex1</sub>Q46 21R1 fibrils are uncoupled.
